# Supplementary material for: GPX3 rs8177412 Polymorphism Modifies Risk of Upper Urothelial Tumors in Patients with Balkan Endemic Nephropathy
Source: MDPI journal article supplement (doi:10.3390/medicina59081421), 2023-08-04
Supplement: s1 [file s1]

**Table S1.** *KEAP1*, *Nrf2*, *GSTP1AB*, *GSTP1CD*, *GPX3* and *MDR1* genotype distributions in female BEN patients and controls, and the risk for BEN development

| Genotype                 | Patients,<br><i>n</i> (%) | Controls,<br><i>n</i> (%) | OR 1 <sup>a</sup><br>(95% CI) | <i>p</i> | OR 2<br>(95% CI) | <i>p</i> | OR 3<br>(95% CI) | <i>p</i> | OR 4<br>(95% CI) | <i>p</i> |
|--------------------------|---------------------------|---------------------------|-------------------------------|----------|------------------|----------|------------------|----------|------------------|----------|
| <i>KEAP1</i> rs1048290   |                           |                           |                               |          |                  |          |                  |          |                  |          |
| *C/C <sup>c</sup>        | 11 (12)                   | 11 (15)                   | 1.0                           | -        | 1.0              | -        | 1.0              |          | 1.0              | -        |
| *C/G*G/G                 | 81 (88)                   | 60 (85)                   | 1.35 (0.54-3.32)              | 0.513    | 1.49 (0.58-3.78) | 0.399    | 1.32 (0.53-3.28) | 0.549    | 1.43 (0.55-3.71) | 0.453    |
| <i>Nrf2</i> rs6721961    |                           |                           |                               |          |                  |          |                  |          |                  |          |
| *C/C <sup>c</sup>        | 67 (73)                   | 57 (80)                   | 1.0                           | -        | 1.0              | -        | 1.0              |          | 1.0              | -        |
| *C/A*A/A                 | 25 (27)                   | 14 (20)                   | 1.51 (0.72-3.19)              | 0.270    | 1.47 (0.68-3.18) | 0.323    | 1.46 (0.68-3.10) | 0.323    | 1.39 (0.63-3.05) | 0.406    |
| <i>GSTP1AB</i> rs1695    |                           |                           |                               |          |                  |          |                  |          |                  |          |
| *A/A <sup>c</sup>        | 41 (45)                   | 35 (49)                   | 1.0                           | -        | 1.0              | -        | 1.0              |          | 1.0              | -        |
| *A/G*G/G                 | 51 (55)                   | 36 (51)                   | 1.20 (0.65-2.25)              | 0.548    | 1.27 (0.66-2.45) | 0.461    | 1.09 (0.57-2.06) | 0.781    | 1.15 (0.59-2.25) | 0.667    |
| <i>GSTP1CD</i> rs1138272 |                           |                           |                               |          |                  |          |                  |          |                  |          |
| *C/C <sup>c</sup>        | 85 (92)                   | 66 (93)                   | 1.0                           | -        | 1.0              | -        | 1.0              |          | 1.0              | -        |
| *C/T*T/T                 | 7 (8)                     | 5 (7)                     | 1.08 (0.33-3.58)              | 0.891    | 0.96 (0.27-3.36) | 0.961    | 1.02 (0.30-3.45) | 0.970    | 1.27 (0.55-2.93) | 0.931    |
| <i>GPX3</i> rs8177412    |                           |                           |                               |          |                  |          |                  |          |                  |          |
| *T/T <sup>c</sup>        | 66 (72)                   | 60 (85)                   | 1.0                           | -        | 1.0              | -        | 1.0              |          | 1.0              | -        |
| *T/C*C/C                 | 26 (28)                   | 11 (15)                   | 2.14 (0.97-4.72)              | 0.057    | 2.15 (0.96-4.81) | 0.062    | 2.09 (0.94-4.64) | 0.068    | 2.09 (0.92-4.72) | 0.075    |
| <i>MDR1</i> rs1045642    |                           |                           |                               |          |                  |          |                  |          |                  |          |
| *C/C <sup>c</sup>        | 16 (18)                   | 19 (27)                   | 1.0                           | -        | 1.0              | -        | 1.0              |          | 1.0              | -        |
| *C/T*T/T                 | 74 (82)                   | 52 (73)                   | 1.69 (0.79-3.13)              | 0.172    | 1.51 (0.69-3.29) | 0.296    | 1.97 (0.89-4.32) | 0.090    | 1.75 (0.78-3.93) | 0.169    |

<sup>a</sup>OR—odds ratio; OR 1—crude results, without confounding factors; OR 2—with other two genes as confounding factors; OR 3—with age as confounding factor; OR 4—with all previously stated confounding factors; 95%CI—95% confidence interval; *p* < 0.05 was considered statistically significant; <sup>c</sup>referent group.

**Table S2.** *KEAP1*, *Nrf2*, *GSTP1AB*, *GSTP1CD*, *GPX3* and *MDR1* genotype distributions in male BEN patients and controls, and the risk for BEN development

| Genotype                 | Patients,<br><i>n</i> (%) | Controls,<br><i>n</i> (%) | OR 1 <sup>a</sup><br>(95% CI) | <i>p</i> | OR 2<br>(95% CI) | <i>p</i> | OR 3<br>(95% CI) | <i>p</i> | OR 4<br>(95% CI) | <i>p</i> |
|--------------------------|---------------------------|---------------------------|-------------------------------|----------|------------------|----------|------------------|----------|------------------|----------|
| <i>KEAP1</i> rs1048290   |                           |                           |                               |          |                  |          |                  |          |                  |          |
| *C/C <sup>c</sup>        | 24 (20)                   | 11 (16)                   | 1.0                           | -        | 1.0              | -        | 1.0              | -        | 1.0              | -        |
| *C/G*G/G                 | 93 (80)                   | 58 (84)                   | 0.73 (0.33-1.61)              | 0.442    | 0.77 (0.34-1.74) | 0.531    | 0.73 (0.33-1.61) | 0.444    | 0.76 (0.34-1.73) | 0.528    |
| <i>Nrf2</i> rs6721961    |                           |                           |                               |          |                  |          |                  |          |                  |          |
| *C/C <sup>c</sup>        | 91 (78)                   | 46 (67)                   | 1.0                           | -        | 1.0              | -        | 1.0              | -        | 1.0              | -        |
| *C/A*A/A                 | 26 (22)                   | 23 (33)                   | 0.57 (0.29-1.10)              | 0.098    | 0.57 (0.29-1.13) | 0.110    | 1.01 (0.96-1.05) | 0.175    | 0.58 (0.29-1.14) | 0.118    |
| <i>GSTP1AB</i> rs1695    |                           |                           |                               |          |                  |          |                  |          |                  |          |
| *A/A <sup>c</sup>        | 55 (47)                   | 29 (42)                   | 1.0                           | -        | 1.0              | -        | 1.0              | -        | 1.0              | -        |
| *A/G*G/G                 | 62 (53)                   | 40 (58)                   | 0.81 (0.44-1.49)              | 0.510    | 0.73 (0.38-1.39) | 0.348    | 0.82 (0.45-1.50) | 0.531    | 0.74 (0.39-1.41) | 0.370    |
| <i>GSTP1CD</i> rs1138272 |                           |                           |                               |          |                  |          |                  |          |                  |          |
| *C/C <sup>c</sup>        | 102 (87)                  | 63 (92)                   | 1.0                           | -        | 1.0              | -        | 1.0              | -        | 1.0              | -        |
| *C/T*T/T                 | 15 (13)                   | 6 (8)                     | 1.54 (0.56-4.18)              | 0.393    | 1.66 (0.58-4.81) | 0.342    | 1.56 (0.57-4.26) | 0.377    | 1.67 (0.58-4.81) | 0.340    |
| <i>GPX3</i> rs8177412    |                           |                           |                               |          |                  |          |                  |          |                  |          |
| *T/T <sup>c</sup>        | 93 (80)                   | 52 (75)                   | 1.0                           | -        | 1.0              | -        | 1.0              | -        | 1.0              | -        |
| *T/C*C/C                 | 24 (20)                   | 17 (25)                   | 0.78 (0.38-1.60)              | 0.513    | 0.80 (0.38-1.66) | 0.554    | 0.79 (0.39-1.62) | 0.536    | 0.81 (0.39-1.70) | 0.587    |
| <i>MDR1</i> rs1045642    |                           |                           |                               |          |                  |          |                  |          |                  |          |
| *C/C <sup>c</sup>        | 23 (20)                   | 17 (25)                   | 1.0                           | -        | 1.0              | -        | 1.0              | -        | 1.0              | -        |
| *C/T*T/T                 | 89 (80)                   | 52 (75)                   | 1.26 (0.61-2.58)              | 0.519    | 1.16 (0.55-2.44) | 0.679    | 1.27 (0.62-2.60) | 0.509    | 1.17 (0.56-2.45) | 0.670    |

<sup>a</sup>OR—odds ratio; OR 1—crude results, without confounding factors; OR 2—with other two genes as confounding factors; OR 3—with age as confounding factor; OR 4—with all previously stated confounding factors; 95%CI—95% confidence interval; *p* < 0.05 was considered statistically significant; <sup>c</sup> referent group.
